# Supplementary material for: Effect of Application Amounts on In Vitro Dermal Absorption Test Using Caffeine and Testosterone
Source: MDPI journal article supplement (doi:10.3390/pharmaceutics13050641), 2021-04-30
Supplement: s1 [file s1]

# Supplementary Materials: Effect of Application Amounts on In Vitro Dermal Absorption Test Using Caffeine and Testosterone

Jueng-Eun Im, Hyang Yeon Kim, Jung Dae Lee, Jin-Ju Park, Kyung-Soo Kang and Kyu-Bong Kim

**Table S1.** Intra-day and inter-day accuracy and precision of caffeine.

| Matrix                                      | Concentration<br>( $\mu\text{g/mL}$ ) | Intra-Day                 |                            | Inter-Day                 |                            |
|---------------------------------------------|---------------------------------------|---------------------------|----------------------------|---------------------------|----------------------------|
|                                             |                                       | Accuracy <sup>1</sup> (%) | Precision <sup>2</sup> (%) | Accuracy <sup>1</sup> (%) | Precision <sup>2</sup> (%) |
| WASH <sup>3</sup> (cream)                   | 0.05                                  | 90.8                      | 14.7                       | 96.7                      | 18.7                       |
|                                             | 0.15                                  | 93.9                      | 8.8                        | 97.8                      | 8.4                        |
|                                             | 0.60                                  | 101.8                     | 2.0                        | 102.5                     | 2.3                        |
|                                             | 1.20                                  | 102.9                     | 2.0                        | 103.7                     | 2.5                        |
| WASH <sup>3</sup> (solution)                | 0.05                                  | 104.8                     | 7.3                        | 94.8                      | 14.8                       |
|                                             | 0.15                                  | 96.3                      | 3.7                        | 95.9                      | 3.8                        |
|                                             | 0.60                                  | 105.5                     | 5.1                        | 103.1                     | 4.3                        |
|                                             | 1.20                                  | 105.6                     | 3.4                        | 102.8                     | 3.8                        |
| S.C <sup>4</sup>                            | 0.05                                  | 104.0                     | 7.7                        | 98.4                      | 9.9                        |
|                                             | 0.15                                  | 98.3                      | 6.6                        | 98.0                      | 11.4                       |
|                                             | 0.60                                  | 103.9                     | 1.9                        | 108.5                     | 5.9                        |
|                                             | 1.20                                  | 107.6                     | 3.2                        | 102.7                     | 5.6                        |
| SKIN <sup>5</sup> (rat)                     | 0.05                                  | 100.8                     | 11.6                       | 94.0                      | 18.0                       |
|                                             | 0.15                                  | 89.7                      | 5.4                        | 91.5                      | 5.7                        |
|                                             | 0.60                                  | 111.7                     | 3.2                        | 100.5                     | 9.4                        |
|                                             | 1.20                                  | 102.4                     | 2.8                        | 102.8                     | 7.7                        |
| SKIN <sup>5</sup> (Micro-pig <sup>®</sup> ) | 0.05                                  | 98.0                      | 7.2                        | 102.3                     | 15.0                       |
|                                             | 0.15                                  | 97.9                      | 4.0                        | 95.7                      | 7.2                        |
|                                             | 0.60                                  | 99.1                      | 6.8                        | 100.3                     | 4.5                        |
|                                             | 1.20                                  | 99.1                      | 5.9                        | 102.4                     | 5.4                        |
| R.F <sup>6</sup>                            | 0.05                                  | 105.2                     | 12.1                       | 95.3                      | 14.6                       |
|                                             | 0.15                                  | 98.1                      | 8.2                        | 94.7                      | 5.8                        |
|                                             | 0.60                                  | 102.8                     | 1.4                        | 100.9                     | 3.8                        |
|                                             | 1.20                                  | 100.2                     | 4.5                        | 100.5                     | 4.0                        |

<sup>1</sup>Accuracy: (mean concentration analyzed / nominal concentration)  $\times$  100 (%), <sup>2</sup>Precision: relative standard deviation, <sup>3</sup>WASH: remaining formulation was rinsed using alcohol swabs, <sup>4</sup>S.C: stratum corneum, <sup>5</sup>SKIN: dermis and epidermis, <sup>6</sup>R.F: receptor fluid.

**Table S2.** Intra-day and inter-day accuracy and precision of testosterone.

| Matrix                         | Concentration<br>(µg/mL) | Intra-Day                 |                            | Inter-Day                 |                            |
|--------------------------------|--------------------------|---------------------------|----------------------------|---------------------------|----------------------------|
|                                |                          | Accuracy <sup>1</sup> (%) | Precision <sup>2</sup> (%) | Accuracy <sup>1</sup> (%) | Precision <sup>2</sup> (%) |
| WASH <sup>3</sup> (cream)      | 0.3                      | 105.5                     | 7.6                        | 110.4                     | 9.1                        |
|                                | 0.9                      | 93.6                      | 12.8                       | 95.1                      | 8.5                        |
|                                | 3                        | 110.9                     | 6.6                        | 110.8                     | 5.1                        |
|                                | 8                        | 102.4                     | 6.3                        | 105.8                     | 6.5                        |
| WASH <sup>3</sup> (solution)   | 0.3                      | 111.1                     | 4.0                        | 107.7                     | 7.7                        |
|                                | 0.9                      | 97.3                      | 12.0                       | 93.5                      | 7.5                        |
|                                | 3                        | 103.9                     | 6.5                        | 105.6                     | 4.2                        |
|                                | 8                        | 98.6                      | 5.5                        | 102.2                     | 4.4                        |
| S.C <sup>4</sup>               | 0.1                      | 112.6                     | 14.1                       | 108.3                     | 9.9                        |
|                                | 0.3                      | 106.9                     | 2.9                        | 103.6                     | 5.5                        |
|                                | 3                        | 102.7                     | 3.0                        | 107.3                     | 5.2                        |
|                                | 8                        | 103.4                     | 3.2                        | 98.6                      | 8.1                        |
| SKIN <sup>5</sup> (rat)        | 0.1                      | 100.4                     | 7.8                        | 105.1                     | 9.0                        |
|                                | 0.3                      | 107.8                     | 9.9                        | 94.9                      | 12.3                       |
|                                | 3                        | 110.0                     | 1.7                        | 107.9                     | 2.5                        |
|                                | 8                        | 106.5                     | 3.3                        | 105.8                     | 5.1                        |
| SKIN <sup>5</sup> (Micotopig®) | 0.1                      | 96.3                      | 10.1                       | 104.4                     | 11.7                       |
|                                | 0.3                      | 102.9                     | 6.9                        | 106.9                     | 6.1                        |
|                                | 3                        | 108.0                     | 3.4                        | 107.8                     | 5.7                        |
|                                | 8                        | 105.5                     | 6.6                        | 108.2                     | 4.2                        |
| R.F <sup>6</sup>               | 0.1                      | 92.4                      | 10.4                       | 107.3                     | 14.7                       |
|                                | 0.3                      | 106.6                     | 8.0                        | 108.7                     | 5.6                        |
|                                | 3                        | 114.4                     | 3.7                        | 110.6                     | 5.9                        |
|                                | 8                        | 88.4                      | 1.8                        | 102.2                     | 11.1                       |

<sup>1</sup>Accuracy: (mean concentration analyzed / nominal concentration) × 100 (%), <sup>2</sup>Precision: relative standard deviation, <sup>3</sup>WASH: remaining formulation was rinsed using alcohol swabs, <sup>4</sup>S.C: stratum corneum, <sup>5</sup>SKIN: dermis and epidermis, <sup>6</sup>R.F: receptor fluid.
